# Supplementary material for: Potential role for pyruvate kinase M2 in the regulation of murine cardiac glycolytic flux during in vivo chronic hypoxia
Source: Oxford University Press journal article supplement (doi:10.1042/bsr20203170), 2021-05-11
Supplement: bsr-2020-3170_supp.pdf [file bsr-2020-3170_supp.pdf]

**Supplementary Table 1. LC-MS/MS parameters.**

| <b>COMPOUND</b>           | <b>Parent Ion</b> | <b>Daughter Ion</b> | <b>Collision Energy (eV)</b> |
|---------------------------|-------------------|---------------------|------------------------------|
| Glucose-6-phosphate       | 259.0             | 97.0                | 15                           |
| Fructose-6-phosphate      | 259.0             | 97.0                | 13                           |
| Fructose-1,6-bisphosphate | 339.0             | 97.0                | 19                           |
| 3-Phosphoglycerate        | 185.0             | 97.0                | 14                           |
| Phosphoenolpyruvate       | 167.0             | 78.8                | 11                           |
| Pyruvate                  | 87.0              | 43.1                | 8                            |
| Lactate                   | 89.0              | 43.3                | 9                            |
| Oxaloactate               | 131.0             | 87.0                | 8                            |
| Citrate                   | 191.0             | 111.0               | 11                           |
| $\alpha$ -ketoglutarate   | 145.0             | 101.0               | 7                            |
| Succinate                 | 117.0             | 73.0                | 10                           |
| Fumarate                  | 115.0             | 71.0                | 6                            |
| Malate                    | 133.0             | 115.0               | 9                            |
| Alanine                   | 88.0              | 88.0                | 1                            |
| 6-Phosphogluconate        | 275.0             | 97.0                | 15                           |
| Ribose-5-phospate         | 229.0             | 97.0                | 10                           |
| NADPH                     | 744.0             | 664.1               | 35                           |
